# Supplementary material for: Development of new drug delivery system based on ordered mesoporous carbons: characterisation and cytocompatibility studies
Source: Royal Society of Chemistry journal article supplement (doi:10.1039/c3tb20304b), 2013-01-01
Supplement: c3tb20304b.pdf [file c3tb20304b.pdf]

# Development of new drug delivery systems based on ordered mesoporous carbons: Characterisation and cytocompatibility studies

*Christina Karavasili,<sup>1</sup> Elsa P. Amanatiadou,<sup>2</sup> Lambrini Sygellou,<sup>3</sup> Dimitra K.  
Giasafaki,<sup>4</sup> Theodore A. Steriotis,<sup>4</sup> Georgia C. Charalambopoulou,<sup>4</sup> Ioannis  
S.Vizirianakis,<sup>2</sup> Dimitrios G. Fatouros<sup>1,\*</sup>*

<sup>1</sup>Laboratory of Pharmaceutical Technology and <sup>2</sup>Laboratory of Pharmacology,  
Department of Pharmaceutical Sciences, Aristotle University of Thessaloniki, GR-  
54124 Thessaloniki, Greece

<sup>3</sup>Foundation for Research and Technology, Hellas-Institute of Chemical Engineering  
Sciences, FORTH/ICE-HT, P.O. Box 1414, GR-26504 Patras, Greece

<sup>4</sup>National Center for Scientific Research “Demokritos”, Agia Paraskevi Attikis 15341,  
Greece

\*Corresponding author: Dr Dimitrios G. Fatouros

e-mail:dfatouro@pharm.auth.gr

Tel: +302310997653

Fax:+302310997652

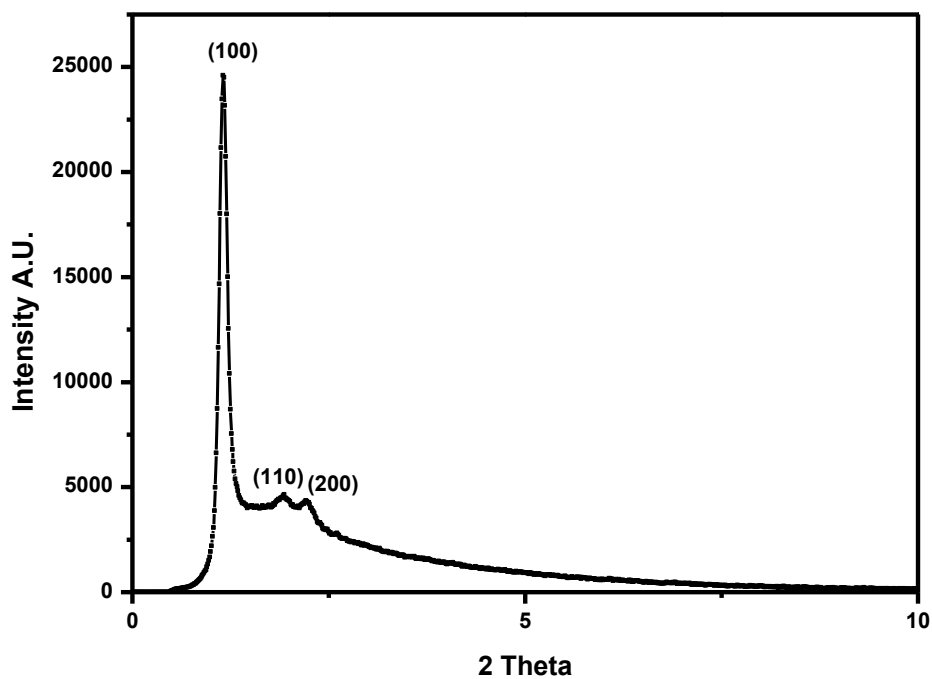

**Figure S1:** Small angle X-ray diffractogram of C3 carbon host.

Figure S1 shows the X-ray diffraction pattern of the pristine C3 carbon material with the characteristic peaks at  $2\theta = 1.14^\circ$ ,  $1.94^\circ$ , and  $2.22^\circ$  assigned to (10), (11), and (20) reflections, respectively, corresponding to a 2-D hexagonal space group ( $p6mm$ ).

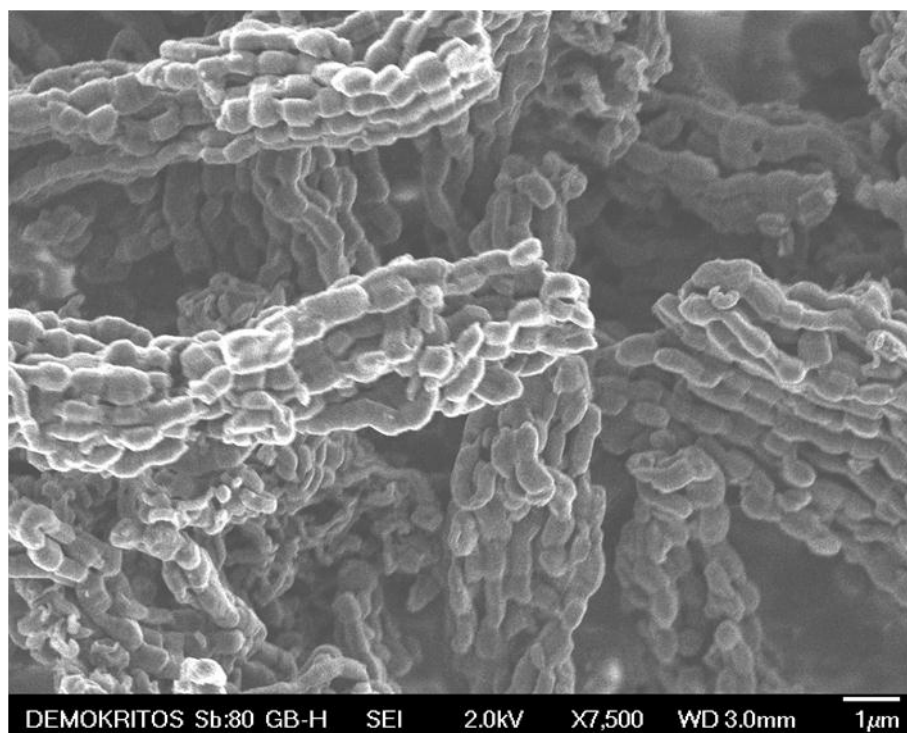

**Figure S2:** SEM image of the pristine C3 type carbon

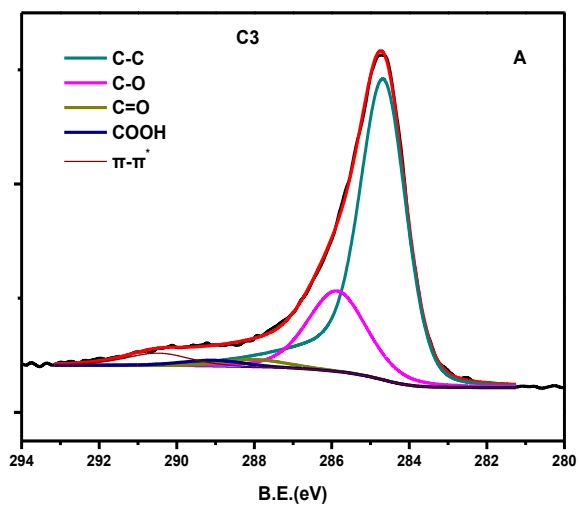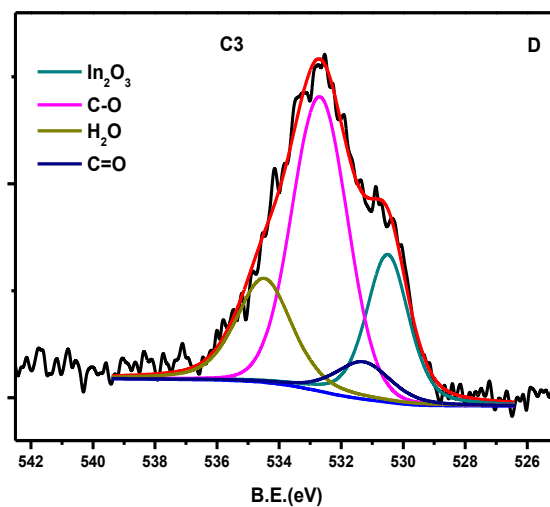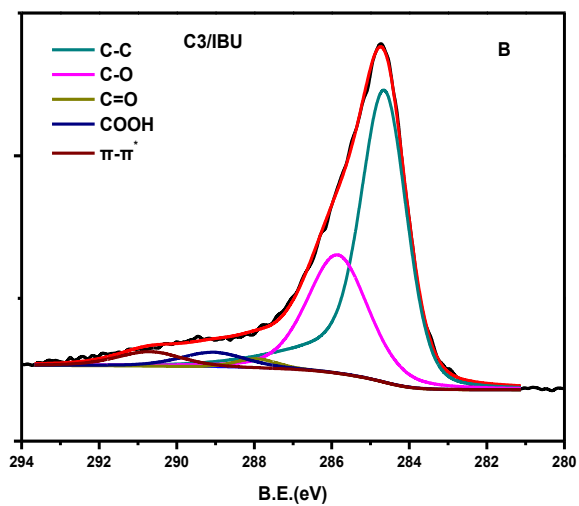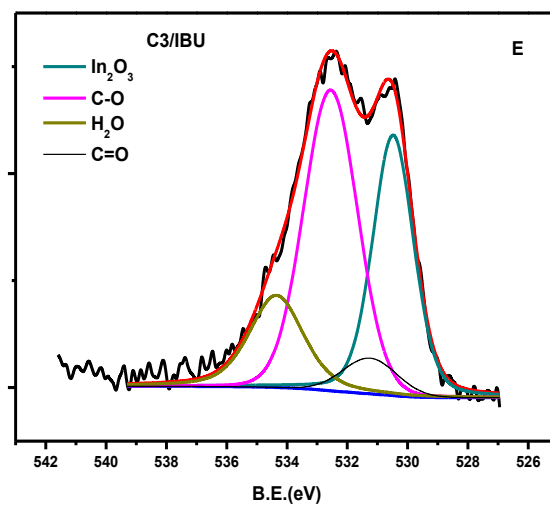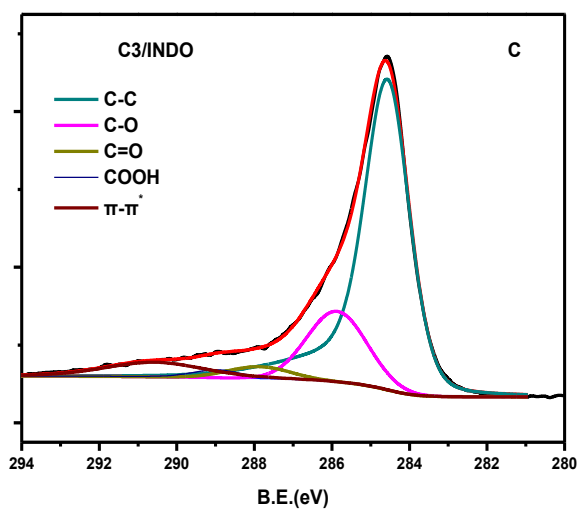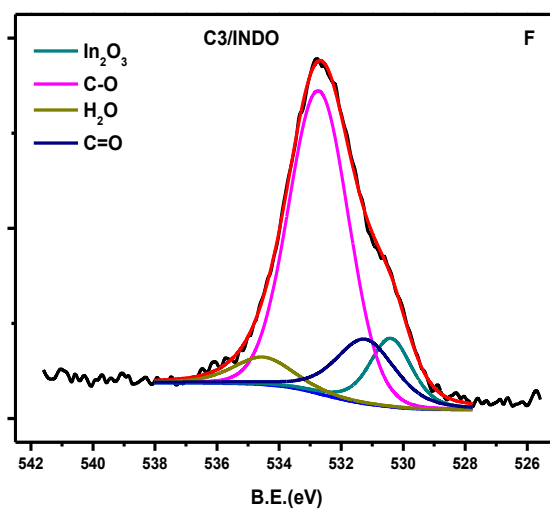

**Figure S3:** XP spectra of C1s peaks of (A) C3, (B) C3/IBU and (C) C3/INDO. XP spectra of O1s peaks of amorphous carbon (D) C3, (E) C3/IBU and (F) C3/INDO.

Figure S3A shows the C1s peak of the C3 carbon sample. The peak is analyzed into 5 components corresponds to (C–C) component at  $284.7 \pm 0.1$  eV (benzolic groups), C–O(H) groups at  $286.3 \pm 0.1$  eV C=O carbonyl groups at  $288.0 \pm 0.1$  eV carboxyl groups and –COOH carbonates at 289.1 eV, and a component at  $\sim 291$  eV due to  $\pi$ - $\pi^*$  transition.<sup>1</sup> Similarly, C1s peak of the C3/IBU and C3/INDO samples are analyzed into C-oxides components with the same characteristics (Binding Energy, Width: FWHM) as in the pristine C3 material. Figure S3C shows the C1s peak of INDO sample where the C-O component is pronounced.

Figure S3D, E & F shows the O1s photoelectron peak of the samples and the deconvolution of this peak into four components. The first one at 530.5 eV binding energy is referred to Indium oxide substrate and the other three referring to O-C, O=C and –H<sub>2</sub>O ( $E_B$  532.6, 531.3 and  $534.4 \pm 0.2$  eV respectively).<sup>1</sup>

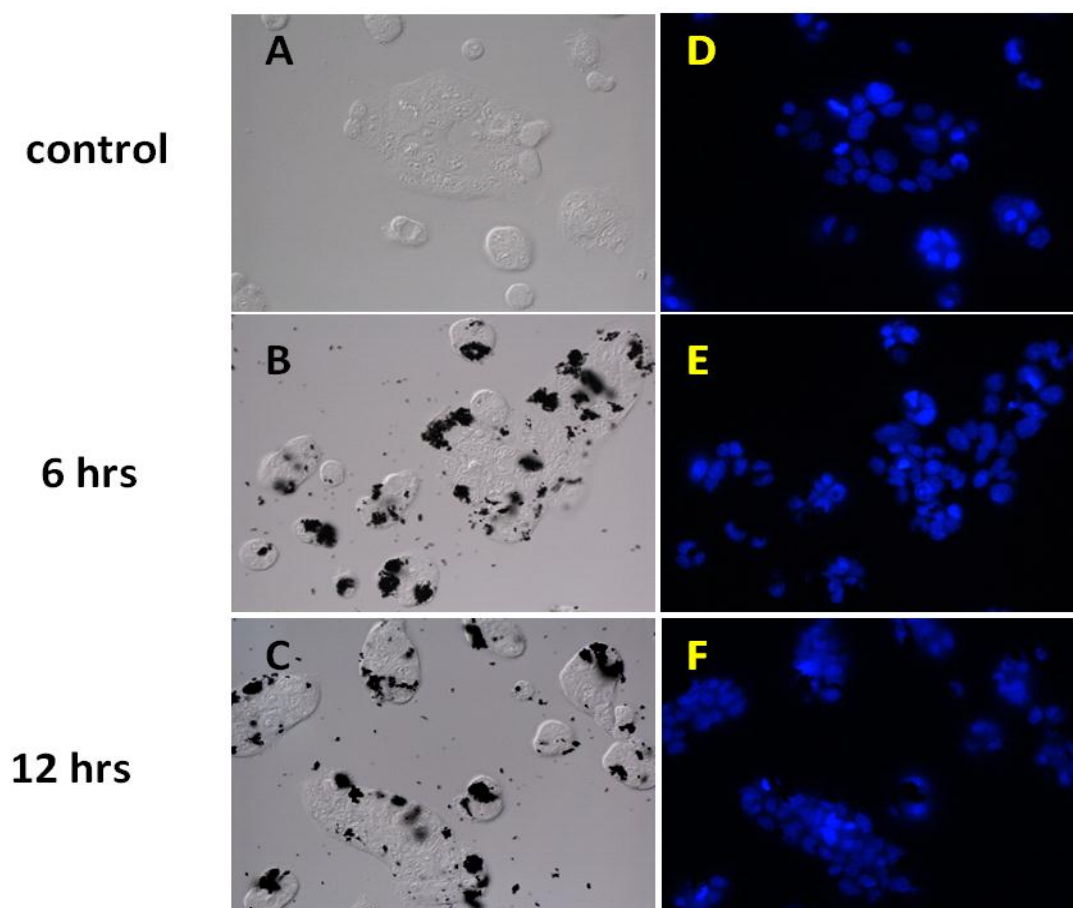

**Figure S4:** DIC micrographs (A,B,C) and DAPI stained nuclei (D,E,F) at different time points (concentration of C3 50  $\mu\text{g/mL}$ )

## References

1. Henriette Estrade-Szwarckopf, Carbon 42 (2004) 1713–1721
